# Supplementary material
Source: PubMed Central journal article supplement (PMC2858908)
Supplement: supp_137.3.467_DEV041335TableS1.pdf [file supp_137.3.467_DEV041335TableS1.pdf]

**Table S1. Genotyping mutant alleles**

| Allele         | Enzyme         | PCR product (bp) | Digest products (bp) |              | Oligonucleotides                      |
|----------------|----------------|------------------|----------------------|--------------|---------------------------------------|
| <i>evr-1</i>   | <i>DdeI</i>    | 220              | <i>evr-1</i>         | 150, 70      | 5'-TCTTCAGGTCATCGAAACAGAGCTCG-3'      |
|                |                |                  | Ler                  | 220          | 5'-TAAGTTCCTTGAGCTCCGACAACATTCCG-3'   |
| <i>evr-2</i>   | <i>Hpy188I</i> | 430              | <i>evr-2</i>         | 220, 180, 30 | 5'-GCAATAAGAGGATCAGAAAAACCACCAGG-3'   |
|                |                |                  | Ler                  | 220, 150, 60 | 5'-CAGCTTGACGTCAGTCAATATATCTTG-3'     |
| <i>evr-3</i>   |                | 530 WT           |                      |              | 5'-GCTTGAGTACCTTCACATGGATCATAAC-3'    |
|                |                | 600 T-DNA        |                      |              | 5'-AGATAGAAGCAAACAATACATATTGAAACAC-3' |
|                |                |                  |                      |              | 5'-GGCAATCAGCTGTTGCCCGTCTCACTGGTG-3'  |
| <i>evr-4</i>   |                | 530 WT           |                      |              | 5'-AGATAGAAGCAAACAATACATATTGAAACAC-3' |
|                |                | 400 T-DNA        |                      |              | 5'-GCTTGAGTACCTTCACATGGATCATAAC-3'    |
|                |                |                  |                      |              | 5'-AGATAGAAGCAAACAATACATATTGAAACAC-3' |
|                |                |                  |                      |              | 5'-GGCAATCAGCTGTTGCCCGTCTCACTGGTG-3'  |
| <i>pepr1-1</i> |                | 525 WT           |                      |              | 5'-AGATAGAAGCAAACAATACATATTGAAACAC-3' |
|                |                | 350 T-DNA        |                      |              | 5'-TCTATCGACCCACATAATTTCCGTTTC-3'     |
|                |                |                  |                      |              | 5'-CATACTCAGCTCCACAAGCTCCTTAGC-3'     |
|                |                |                  |                      |              | 5'-GGCAATCAGCTGTTGCCCGTCTCACTGGTG-3'  |
| <i>evl1-1</i>  |                | 600 WT           |                      |              | 5'-CATACTCAGCTCCACAAGCTCCTTAGC-3'     |
|                |                | 300 T-DNA        |                      |              | 5'-GGAATCTTGGGTTACTCGAAATTAATC-3'     |
|                |                |                  |                      |              | 5'-GTTCCCAAGCAACTCTGGAATGGTAC-3'      |
|                |                |                  |                      |              | 5'-GGCAATCAGCTGTTGCCCGTCTCACTGGTG-3'  |
|                |                |                  |                      |              | 5'-GTTCCCAAGCAACTCTGGAATGGTAC-3'      |
