# Supplementary material
Source: PubMed Central journal article supplement (PMC2858908)

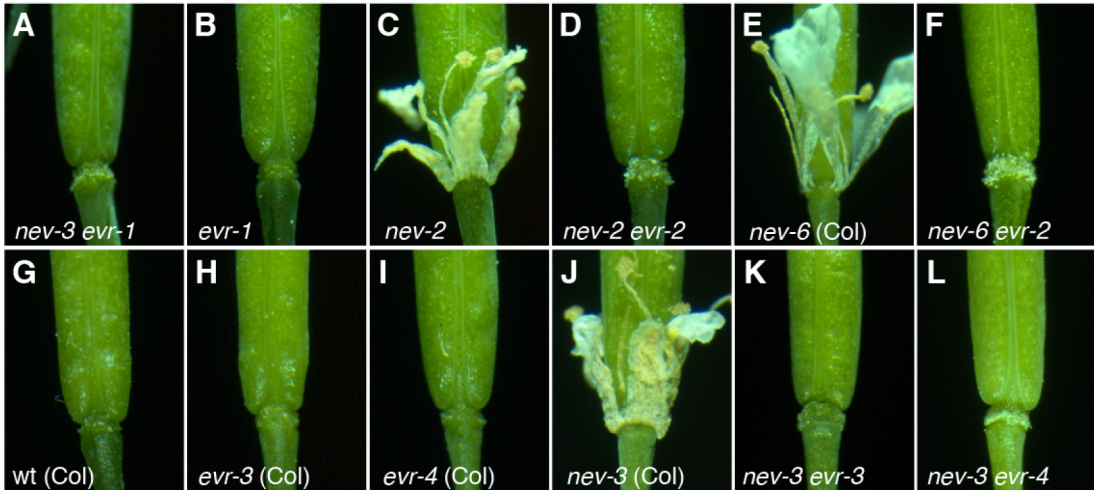

Supplement: supp_137.3.467_041335FigS1.pdf [file supp_137.3.467_041335FigS1.pdf]

gram equivalents

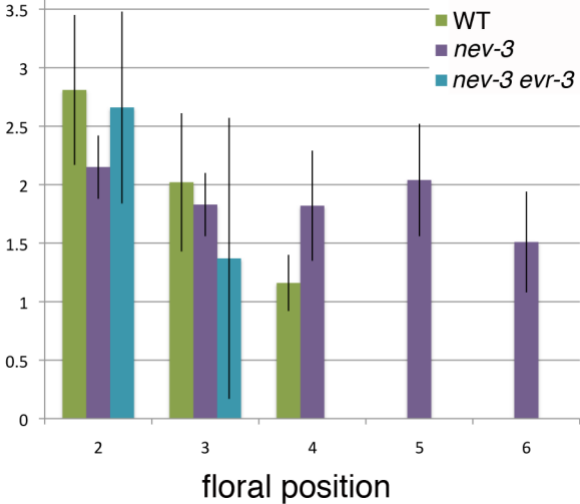

Supplement: supp_137.3.467_041335FigS2.pdf [file supp_137.3.467_041335FigS2.pdf]

**A**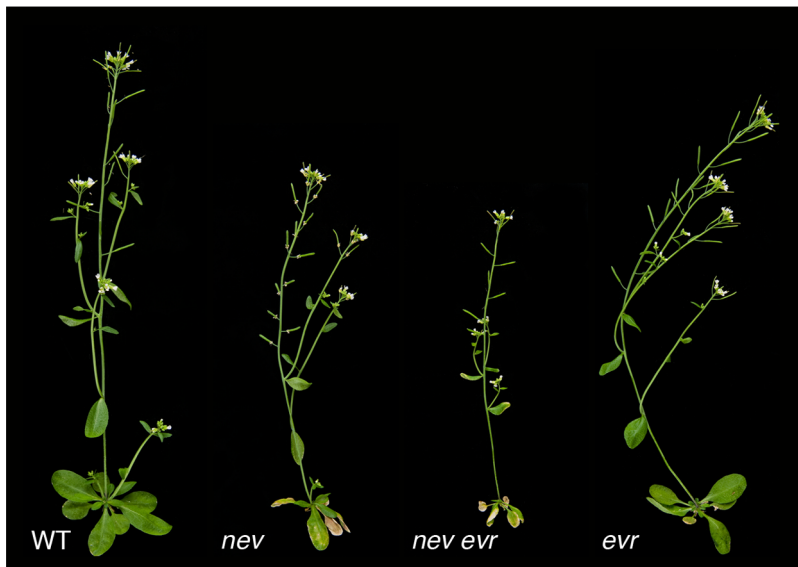**B**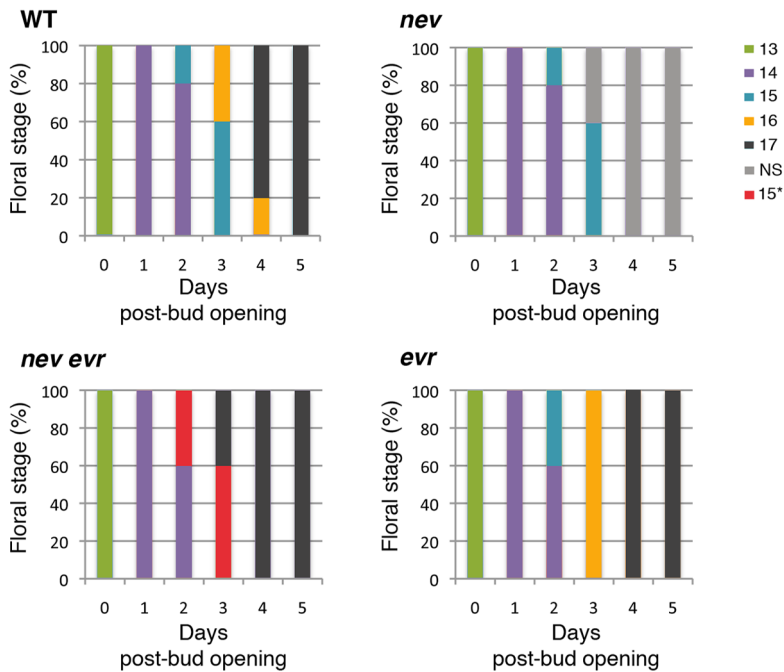

Supplement: supp_137.3.467_041335FigS3.pdf [file supp_137.3.467_041335FigS3.pdf]

**A**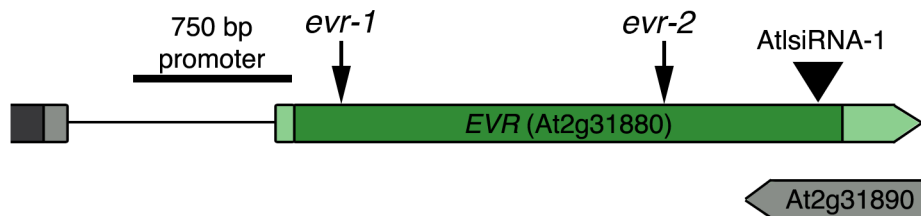**B**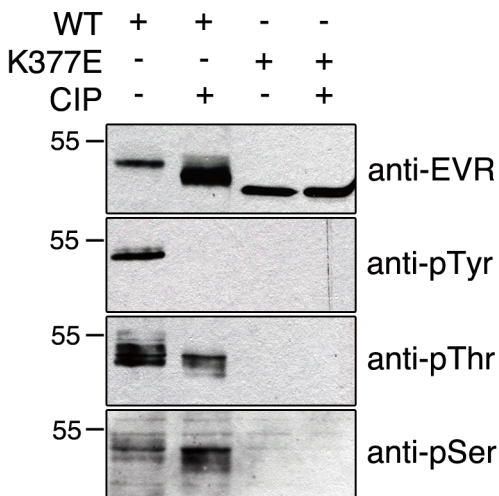**C**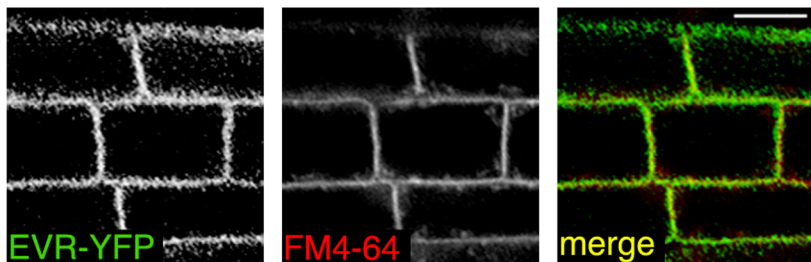

Supplement: supp_137.3.467_041335FigS4.pdf [file supp_137.3.467_041335FigS4.pdf]

**A**

cauline leaves  
floral stages 1-14  
floral stage 17

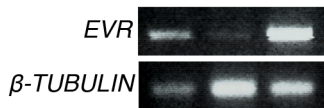**C**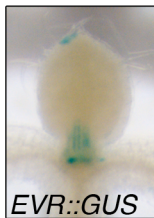**B**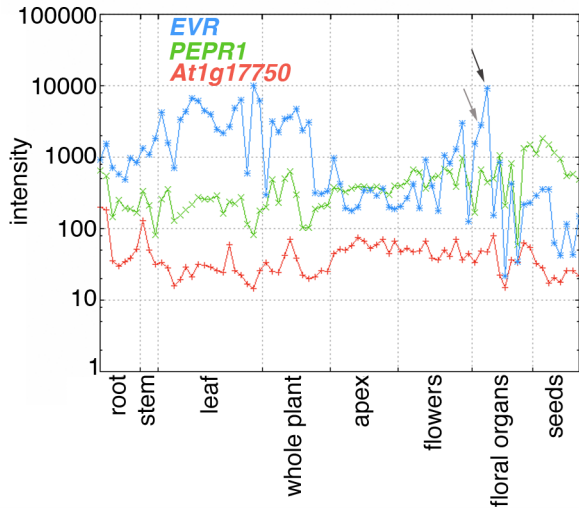

Supplement: supp_137.3.467_041335FigS5.pdf [file supp_137.3.467_041335FigS5.pdf]

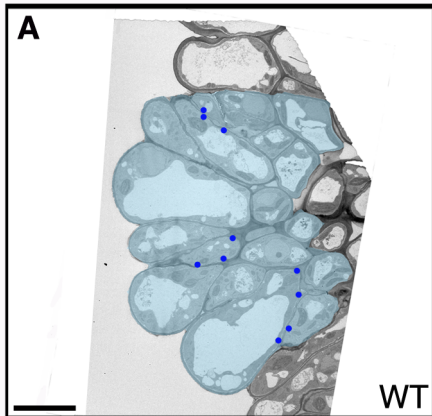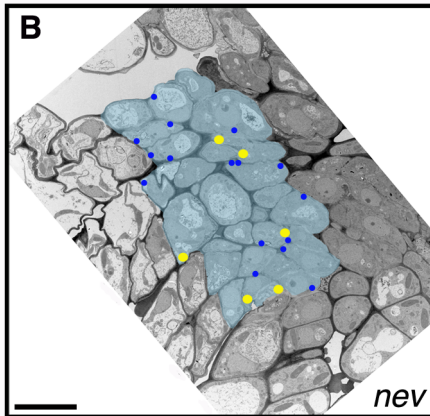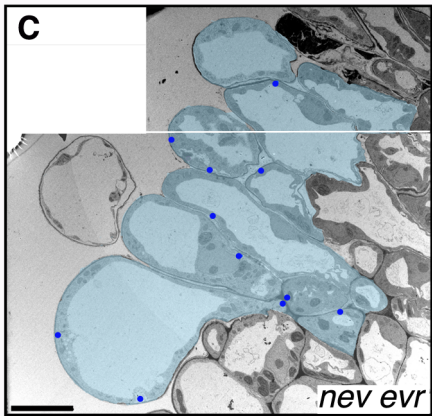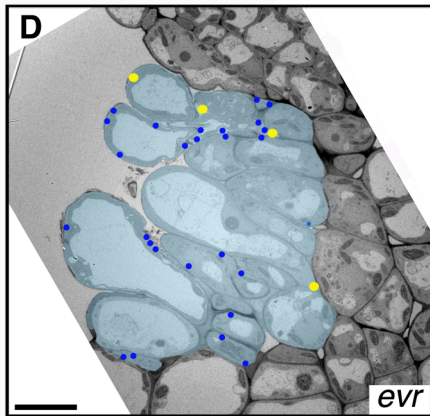

Supplement: supp_137.3.467_041335FigS6.pdf [file supp_137.3.467_041335FigS6.pdf]
